# Supplementary material
Source: Springer Nature journal article supplement (https://www.springermedizin.de/resource/supplementary/12967_2007_215_MOESM6_ESM.pdf/9575962)

A

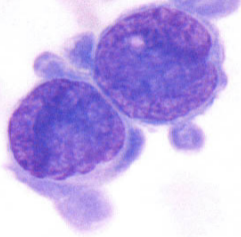

B

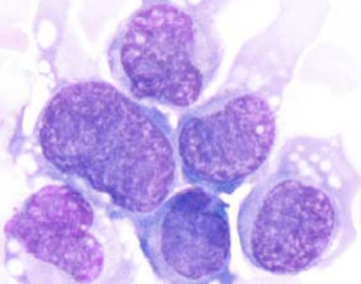

Supplement: MOESM6 [file 9575962]
